# Supplementary material for: 2D/1D PbI2/Sb2S3 van der Waals heterojunction for highly sensitive and broadband photodetectors
Source: Royal Society of Chemistry journal article supplement (doi:10.1039/d3tc04279k), 2024-01-01
Supplement: d3tc04279k1.pdf [file d3tc04279k1.pdf]

# Supporting Information

## 2D/1D PbI<sub>2</sub>/Sb<sub>2</sub>S<sub>3</sub> van der Waals Heterojunction for Highly Sensitive and Broadband Photodetectors

Shili Fu <sup>1,†</sup>, Xiaohui Liu <sup>1,†</sup>, Jiaxiu Man <sup>1</sup>, Quanhong Ou <sup>1</sup>, Xiaolu Zheng <sup>1</sup>, Zhiyong Liu <sup>1,2</sup>, Ting Zhu <sup>1,2,\*</sup>, Hong-En Wang <sup>1,2,\*</sup>

<sup>1</sup> College of Physics and Electronic Information, Yunnan Normal University, 650500 Kunming, Yunnan, China. E-mail: [hongen.wang@ynnu.edu.cn](mailto:hongen.wang@ynnu.edu.cn); [zhut0002@ynnu.edu.cn](mailto:zhut0002@ynnu.edu.cn)

<sup>2</sup> Yunnan Key Laboratory of Optoelectronic Information Technology, Key Laboratory of Advanced Technique & Preparation for Renewable Energy Materials, Ministry of Education, Yunnan Normal University, 650500 Kunming, Yunnan, China. E-mail: [hongen.wang@outlook.com](mailto:hongen.wang@outlook.com)

<sup>†</sup> Shili Fu and Xiaohui Liu contributed equally to this work.

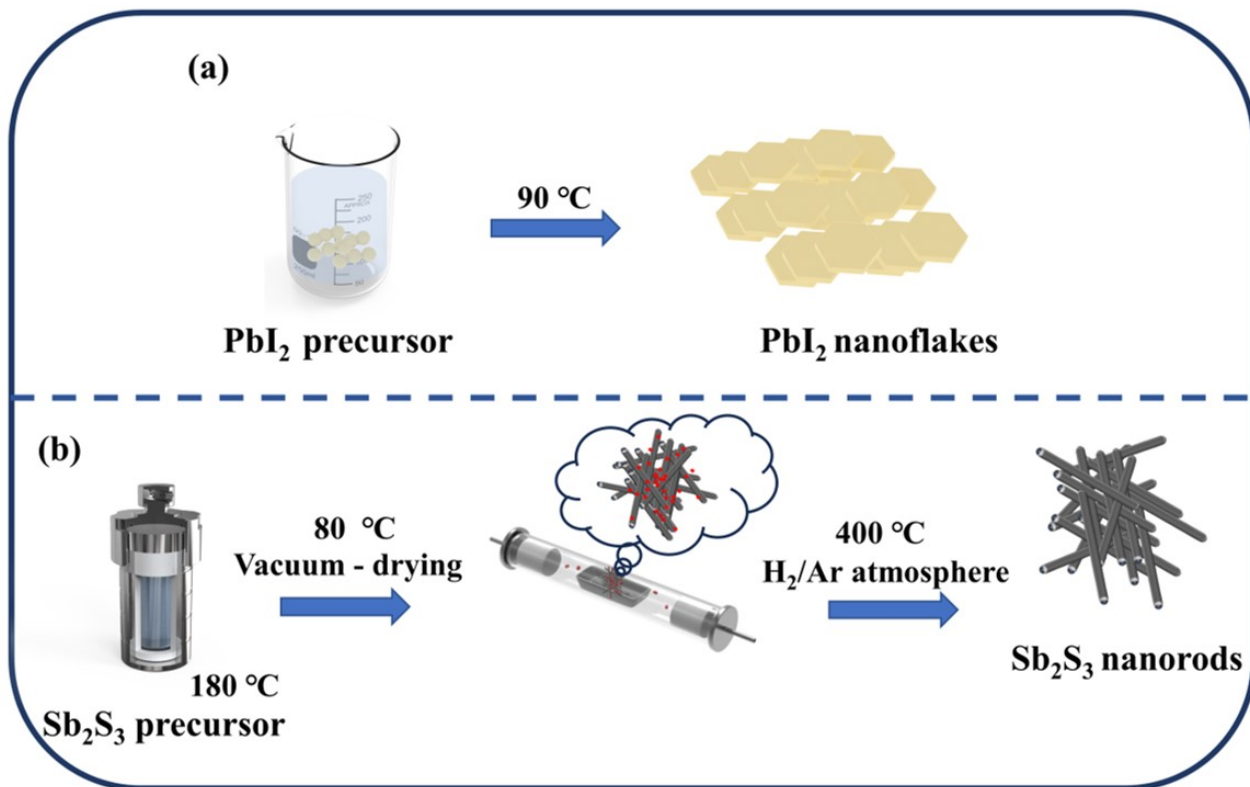

Figure S1. Schematic synthesis routes of (a)  $\text{PbI}_2$  nanosheets and (b)  $\text{Sb}_2\text{S}_3$  microrods, respectively.

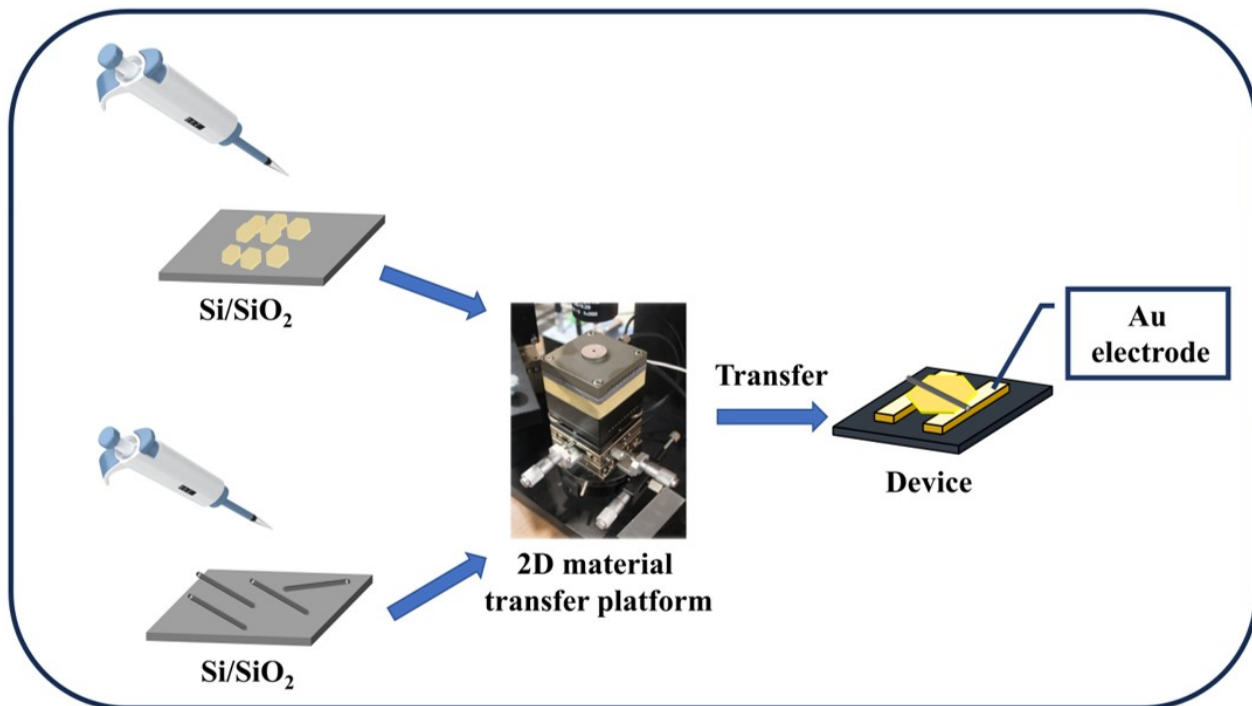

Figure S2. Schematic fabrication procedure of the 2D/1D PbI<sub>2</sub>/Sb<sub>2</sub>S<sub>3</sub> heterojunction device.

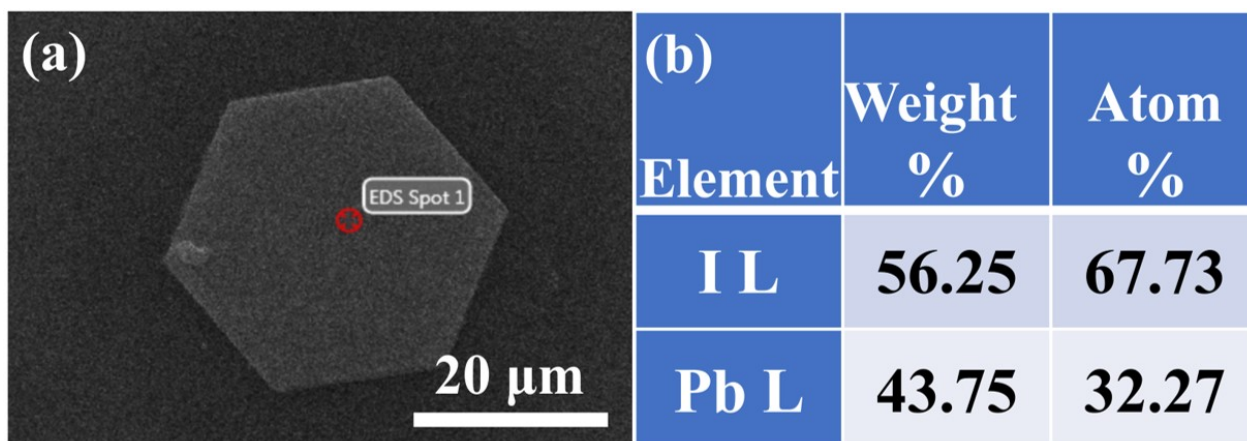

Figure S3. SEM image of a PbI<sub>2</sub> nanosheet (a) and corresponding EDX analysis result of I and Pb elements (b) from a spot selected from the near center region (red circle), showing the atomic ratio of Pb : I is near to 1 : 2.

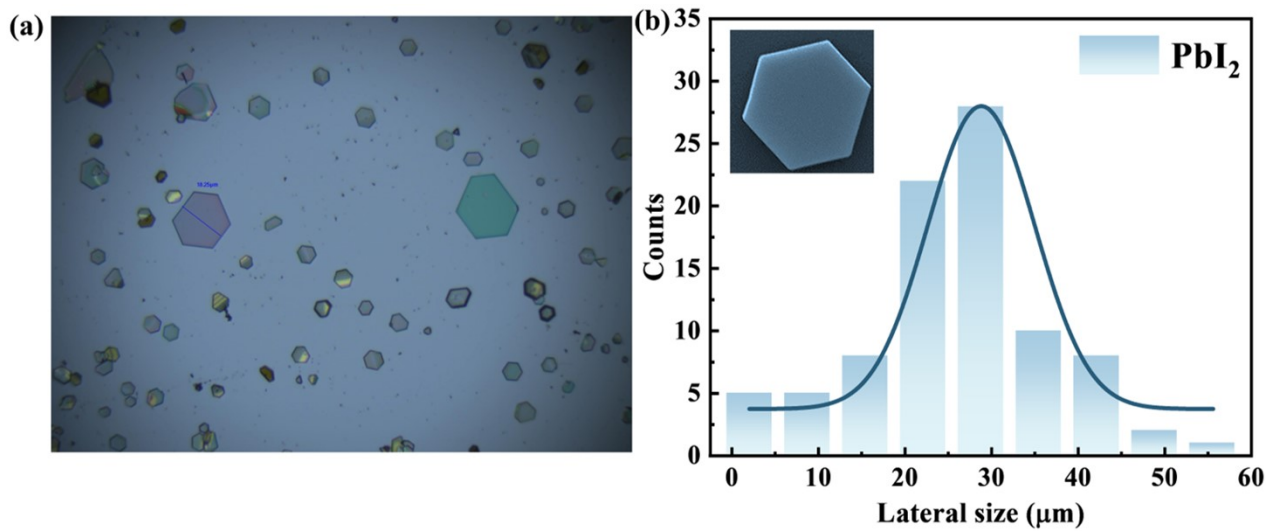

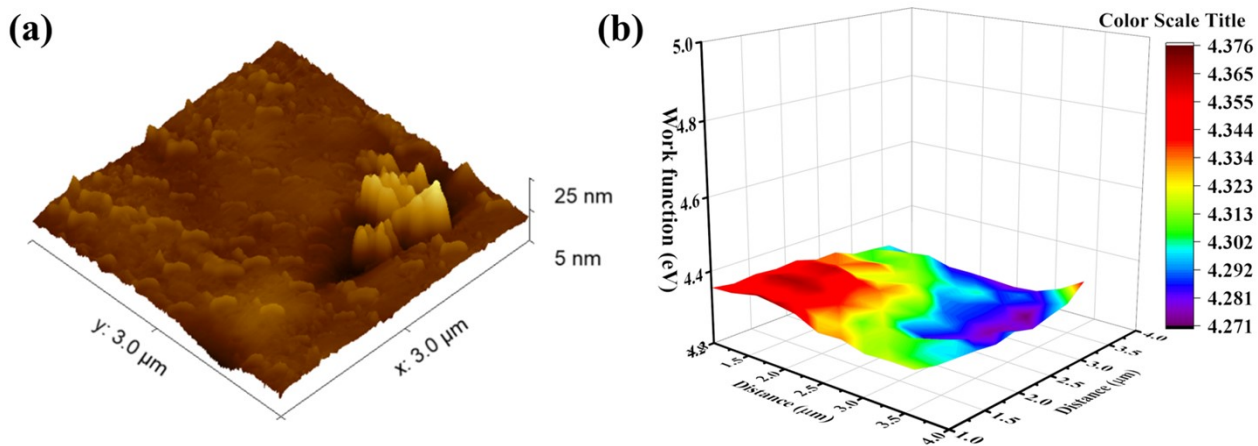

Figure S5. (a) AFM and (b) KPFM images of a selected rectangular area with a size of  $3 \times 3 \mu\text{m}^2$  from a  $\text{PbI}_2$  nanosheet, validating its relatively uniform surface and surface work function distribution.

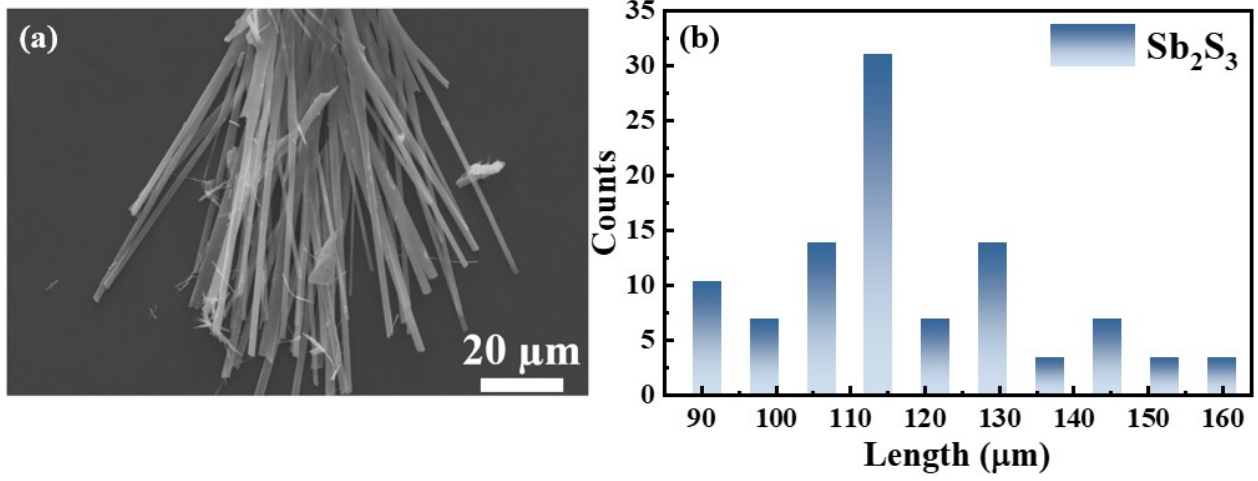

Figure S6. (a) SEM image of Sb<sub>2</sub>S<sub>3</sub> microrods; (b) statistical size distribution of length of Sb<sub>2</sub>S<sub>3</sub> microrods.

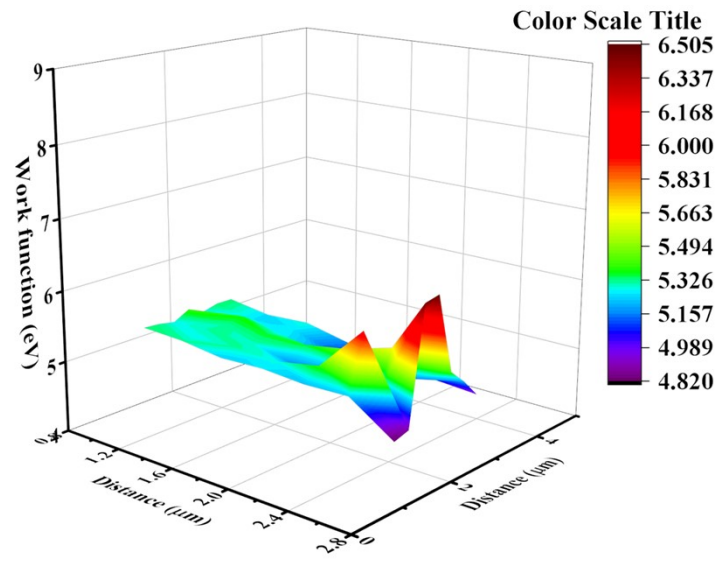

Figure S7. KPFM image of a selected rectangular area measuring  $3 \times 3 \mu\text{m}^2$  from a  $\text{Sb}_2\text{S}_3$  microrod.



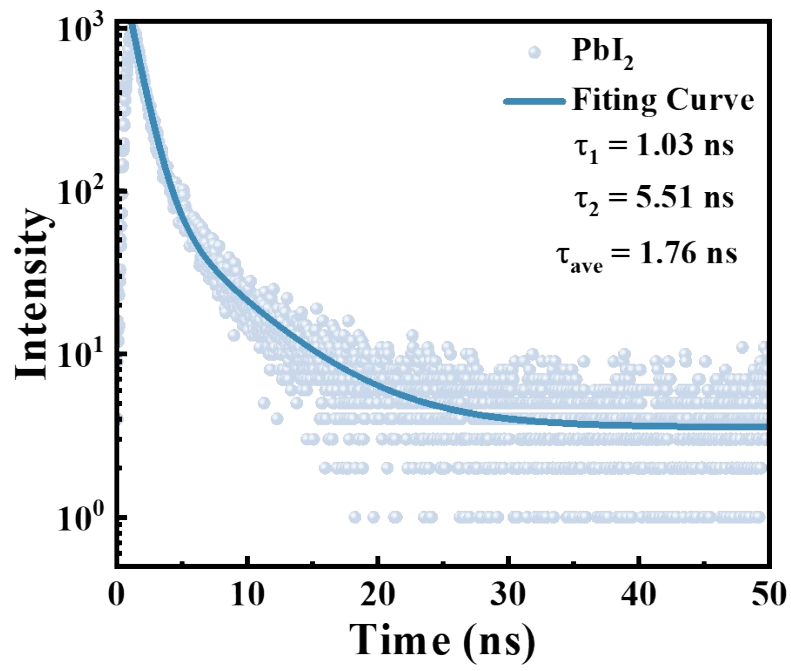

Figure S8. Time-resolved PL (TRPL) spectra of the PbI<sub>2</sub> nanosheets.

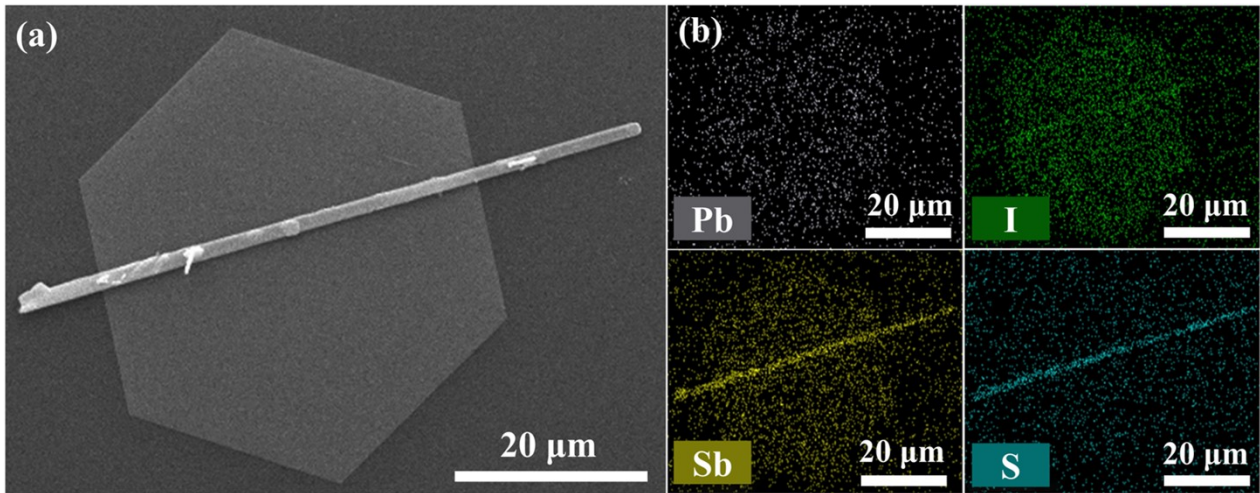

Figure S9. (a) SEM micrograph and (b) corresponding EDX mapping of Pb, I, Sb, and S elements in a 2D/1D  $\text{PbI}_2/\text{Sb}_2\text{S}_3$  heterojunction.

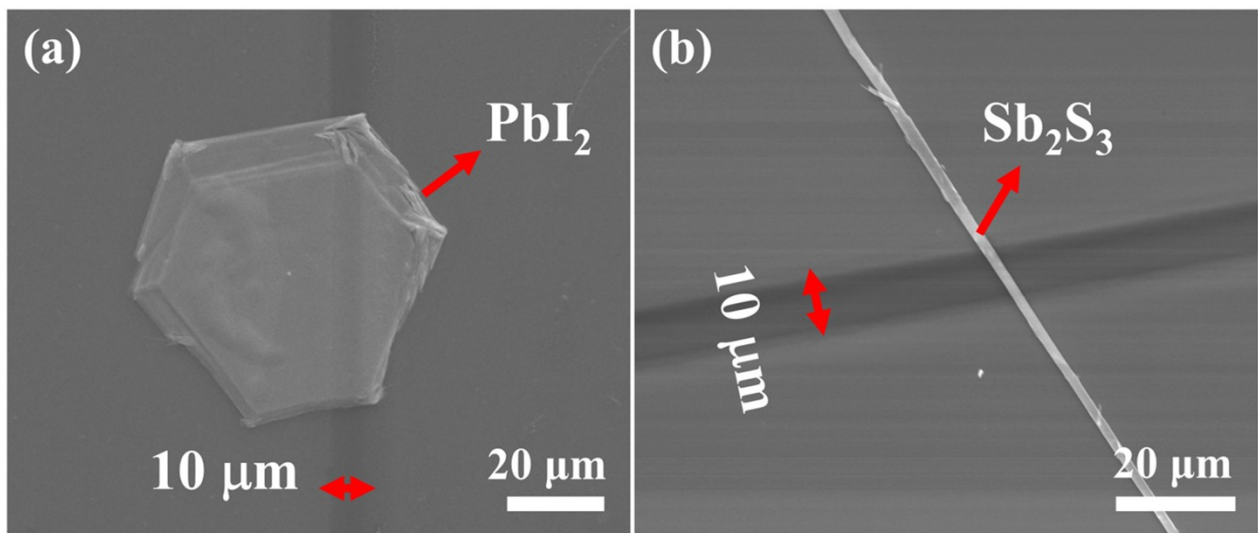

Figure S10. SEM images of (a) a  $\text{PbI}_2$  and (b)  $\text{Sb}_2\text{S}_3$  microrod photodetector device, respectively.

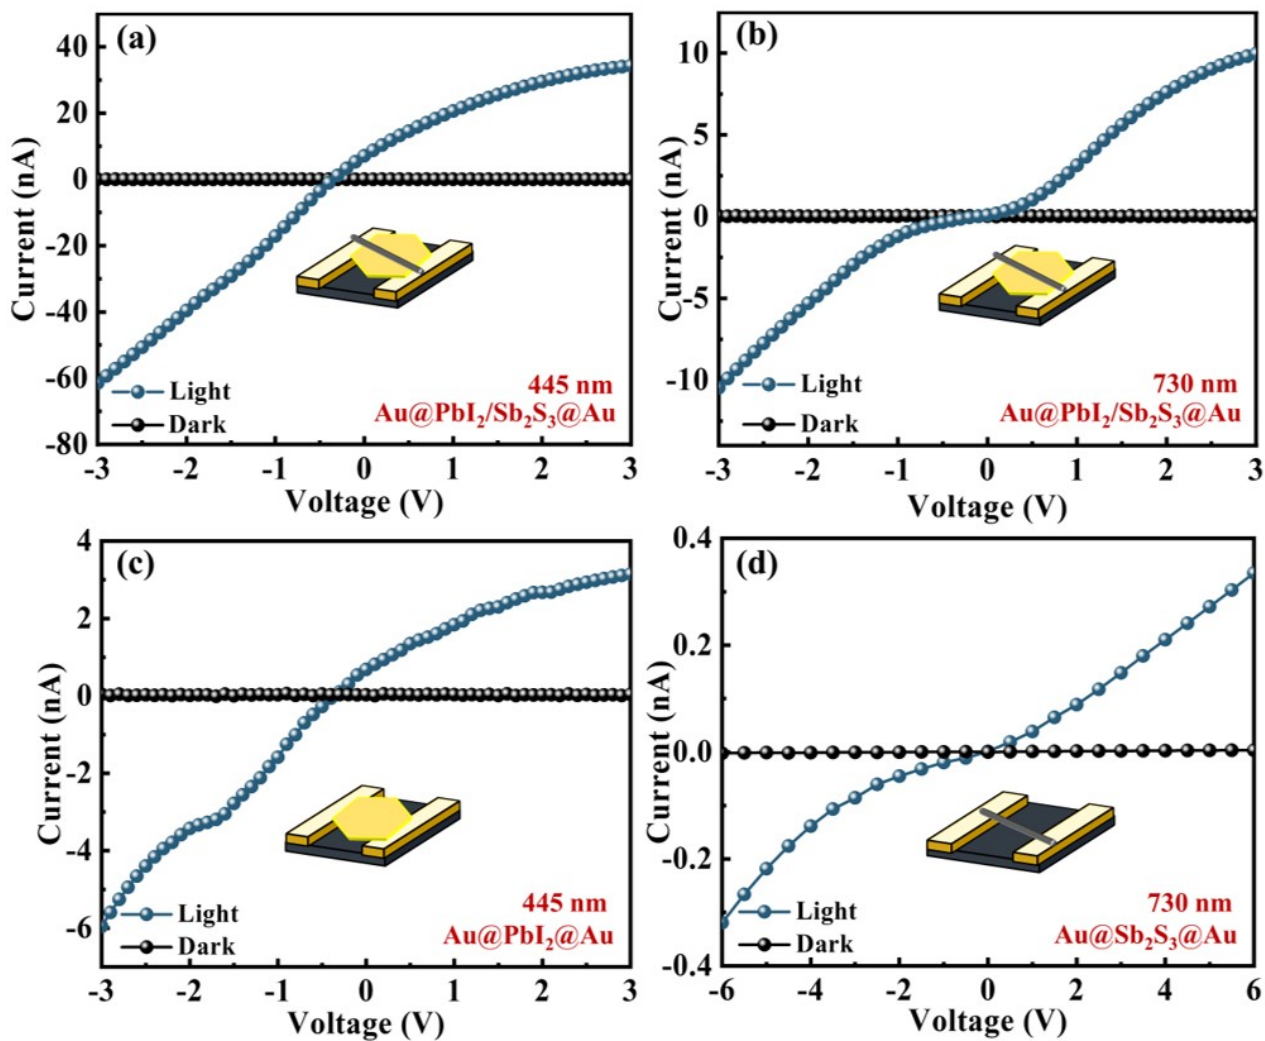

Figure S11. Current-voltage ( $I$ - $V$ ) curves of the  $\text{PbI}_2/\text{Sb}_2\text{S}_3$  photodetector devices measured under dark and (a) 445 nm and (b) 730 nm light illumination, respectively;  $I$ - $V$  curves of the (c)  $\text{PbI}_2$  nanosheet and (d)  $\text{Sb}_2\text{S}_3$  microrod photodetector devices measured under 445 nm and 730 nm illumination, respectively.

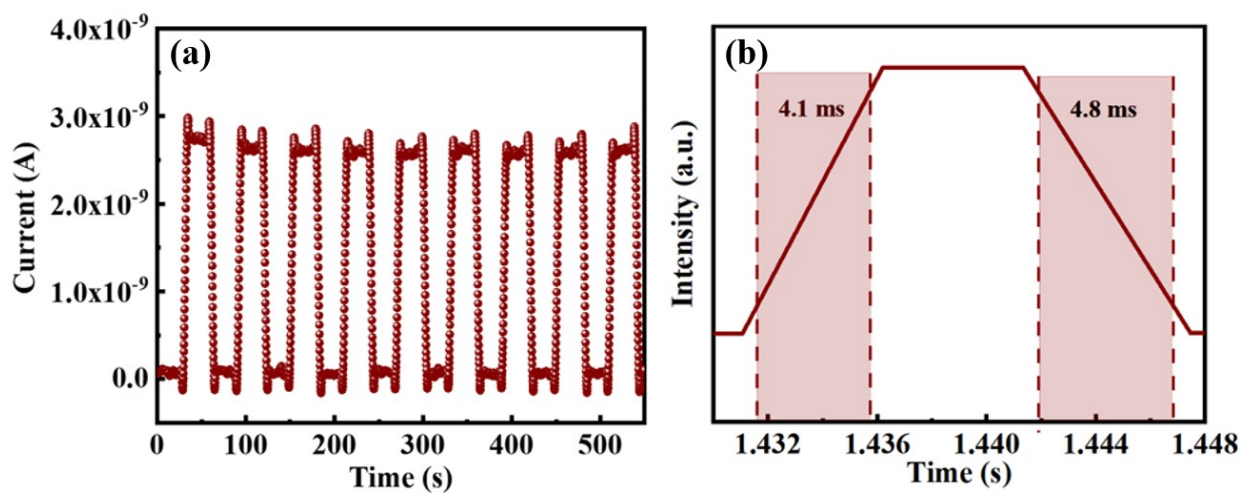

Figure S12. (a) Time-dependent photocurrent and (b) time response curves of an individual  $\text{PbI}_2$  nanosheet device measured at 3 V bias under 445 nm monochromatic light.

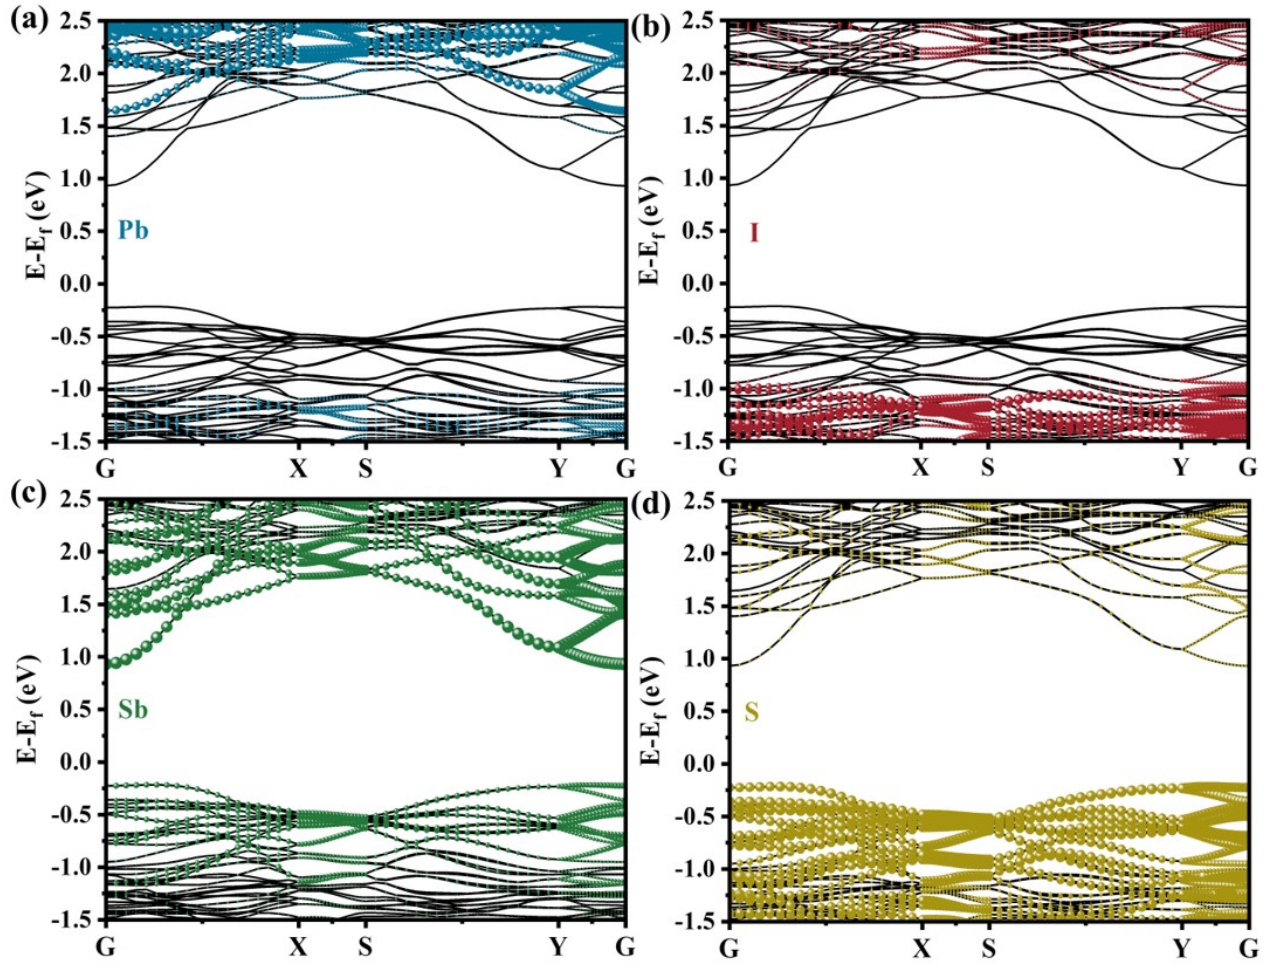

Figure S13. Energy band structure of the  $\text{PbI}_2/\text{Sb}_2\text{S}_3$  heterostructure (black curve) with the respective contribution of (a) Pb (blue spheres), (b) I (red spheres), (c) Sb (green spheres), and (d) S (yellow spheres) element highlighted for clarity.
